# Supplementary material for: Crystalline/amorphous nickel sulfide interface for high current density in alkaline HER: surface and volume confinement matters!
Source: Royal Society of Chemistry journal article supplement (doi:10.1039/d4cc01782j), 2024-01-01
Supplement: d4cc01782j1.pdf [file d4cc01782j1.pdf]

*-Electronic Supplementary Information (ESI)-*

**Crystalline/amorphous nickel sulfide interface for high current density in alkaline  
HER: Surface and Volume confinement matters!**

Prince JJ Sagayaraj, and Karthikeyan Sekar\*

*Sustainable Energy and Environmental Research Laboratory, Department of  
Chemistry, Faculty of Engineering and Technology, SRM Institute of Science and  
Technology, Kattankulathur, Chennai 603203, Tamil Nadu, India.*

Corresponding author Karthikeyan Sekar\*

*E-mail:* [karthiks13@srmist.edu.in](mailto:karthiks13@srmist.edu.in)

## **Experimental section**

### **Chemicals**

Nickel (Ni) foam 99.9% 1.6 mm thickness (MTI Korea), Thiourea, (SRL), Potassium hydroxide (Thermo Fisher Scientific Ltd.), Ammonium chloride (NH<sub>4</sub>Cl), Nickel II chloride hexahydrate, ethanol 99.9% (Changshu Song Sheng Fine Chemicals) were purchased and used as such. Distilled water with 18.2 MΩ from NANO pure Diamond UV deionized water purification system was used for all the synthesis and studies.

### **Synthesis method**

#### **Dynamic Hydrogen Bubble Template method for depositing Porous Ni on Ni foam (NN)**

Ni foam is cut into 1cm × 2cm dimensions and pretreated with 1.5M HCl to remove oxidised surface and further washed with acetone and ethanol to remove any impurities. Ni foam is connected against Ag/AgCl reference electrode (RE) and Pt wire (counter electrode (CE)) in a solution containing 0.1M NiCl<sub>2</sub> and 2M NH<sub>4</sub>Cl. A constant potential of -1.3V vs. Ag/AgCl is applied for 600 s under hydrogen evolution region. Then, the Ni deposited Ni foam (NN) is taken out washed with distilled water and ethanol and dried in vacuum oven for few hours.

#### **Hydrothermal synthesis of Ni<sub>3</sub>S<sub>2</sub> on NN (NNS)**

The NN electrode is sealed in 50 mL Teflon lined stainless steel autoclave containing 1:1 mole ratio of CSN<sub>2</sub>H<sub>4</sub> and KOH respectively, kept in hot air oven at 120°C for 24hr. The autoclave is allowed to cool naturally and the resultant foam (NNS) seemed to change its colour

indicating the successful sulphurisation process. The NNS is washed several times with distilled water to remove any impurities and then followed by ethanol, then dried in vacuum.

### **Electrodeposition of Ni<sub>x</sub>S<sub>y</sub> on NNS (NNS/NNS<sub>x</sub>)**

The electrodeposition process was carried out with suitable modification adapting the previous literature.<sup>1</sup> Briefly, NNS/NNS<sub>x</sub> is synthesized using NNS as WE by potentiostatic deposition for 600 s (-1.8V vs. Ag/AgCl, Pt wire as CE) in an electrolytic solution containing 50 mL of 1:1:10 mole ratio of NiCl<sub>2</sub>, NH<sub>4</sub>Cl and CSN<sub>2</sub>H<sub>4</sub> respectively. The black foam is taken out washed with water and ethanol several times and dried in vacuum. NNS<sub>x</sub> is synthesised by same process using bare NF as WE.

## **Characterisation**

### **Physical Characterisation**

To confirm the crystalline phase X-ray Diffraction analysis (XRD) was done using Malvern PANalytical equipped with Empyrean Cu X-ray tube with K<sub>α</sub> radiation and Pixel3D detector running at 0.02° step scan rate. The topography and morphology of the material were asserted using Field Emission Scanning Electron Microscopy (FE-SEM), Thermoscientific Apreo S and elemental mapping EDS with FEI QUANTA accelerating with 0.02 MV. Hi-resolution Transmission Electron Microscopy (HR-TEM) images was taken using JEOL Japan, JEM-2100 Plus to study the atom arrangements, defects and interplanar distances. Surface compositions and the chemical states of the catalysts were assessed using X-ray Photoelectron spectroscopy (XPS) PHI Versaprobe III. The HORIBA, LabRam HR Evolution MicroRaman Spectrometer was used to indicate the presence of chemical bonds in the material.

### **Electrochemical characterisation**

The whole experiment is carried out in 1.0M KOH, pH 14 being set-up in a conventional three electrode cell model, using Hg/HgO as RE and Ni foam as CE for HER. The electrochemical workstation CHI760E screened the electrochemical studies at room temperature. (Geographical location 12.8250223, 80.0439124).

*HER studies:* The developed electrocatalysts were activated electrochemically by cyclic voltammetry (CV) for several cycles at a scanrate of 50 mVs<sup>-1</sup> against Open Circuit Potential (OCP) to ensure optimum hydrogen saturation around the working electrode (WE). Linear Sweep Voltammetry (LSV) was done at the lowest scanrate 1 mVs<sup>-1</sup> with 100% *iR* compensation. Electrochemical Impedance Spectroscopy (EIS) is operated under catalytic turn-over conditions with AC amplitude 5mV in the wide frequency range 0.1 Hz - 100MHz from which Nyquist, Bode-absolute impedance and Bode phase angle measurements are calculated to interpret charge-transfer rate. Sampled Current Voltammetry (SCV) studies were adapted as mentioned in the previous literature<sup>2</sup> to avoid expendable charging current from LSV. Double layer capacitance (*C<sub>dl</sub>*) method is adapted by increasing the scan from 10 to 200 mVs<sup>-1</sup> for CV in the non-Faradaic region to study charge-discharge phenomenon. Electrochemically accessible sites (ECAS) are calculated by integrating the charge under Ni<sup>3+</sup> to Ni<sup>2+</sup> reduction curve as in the earlier studies.<sup>3</sup> The long-term stability of the material is tested by amperometry studies. All the data obtained from CHI760E is plotted and the graphs are obtained using Microsoft excel.

Firstly, 100% *iR* compensations were made and then converted into universal scale of RHE using the following equation.

$$E_{RHE} = E_{Hg/HgO} + E^{\circ}_{Hg/HgO} + \frac{2.303 RT}{F} pH \quad (S1)$$

$E^{\circ}_{Hg/HgO}$  – calibrated everytime using standard method of carrying out HER with Pt foil

**R** – universal gas constant (8.314 JK<sup>-1</sup>mol<sup>-1</sup>)

**T** – room temperature in °C

**F** – Faraday constant (96485 C mol<sup>-1</sup>)

Tafel analysis was done in the HER region was calculated from the following Tafel equation,

$$\eta = a - b \log j \quad (S2)$$

where “ $\eta$ ” is the overpotential  $E - E_{iR}$  vs. RHE in V, “ $a$ ” is Tafel constant, “ $b$ ” is Tafel slope in V dec<sup>-1</sup> and “ $j$ ” is current density in mA cm<sup>-2</sup>.

The Tafel constant “ $a$ ” was calculated by the following equations:

$$\text{Intercept, } a = \frac{2.303 RT}{\alpha n F} \log j_0 \quad (\text{S3})$$

$$\alpha n = \frac{2.303 RT}{b F} \quad (\text{S4})$$

Here “ $\alpha$ ” is the transfer coefficient, “ $j_0$ ” is the exchange current density in mA cm<sup>-2</sup>

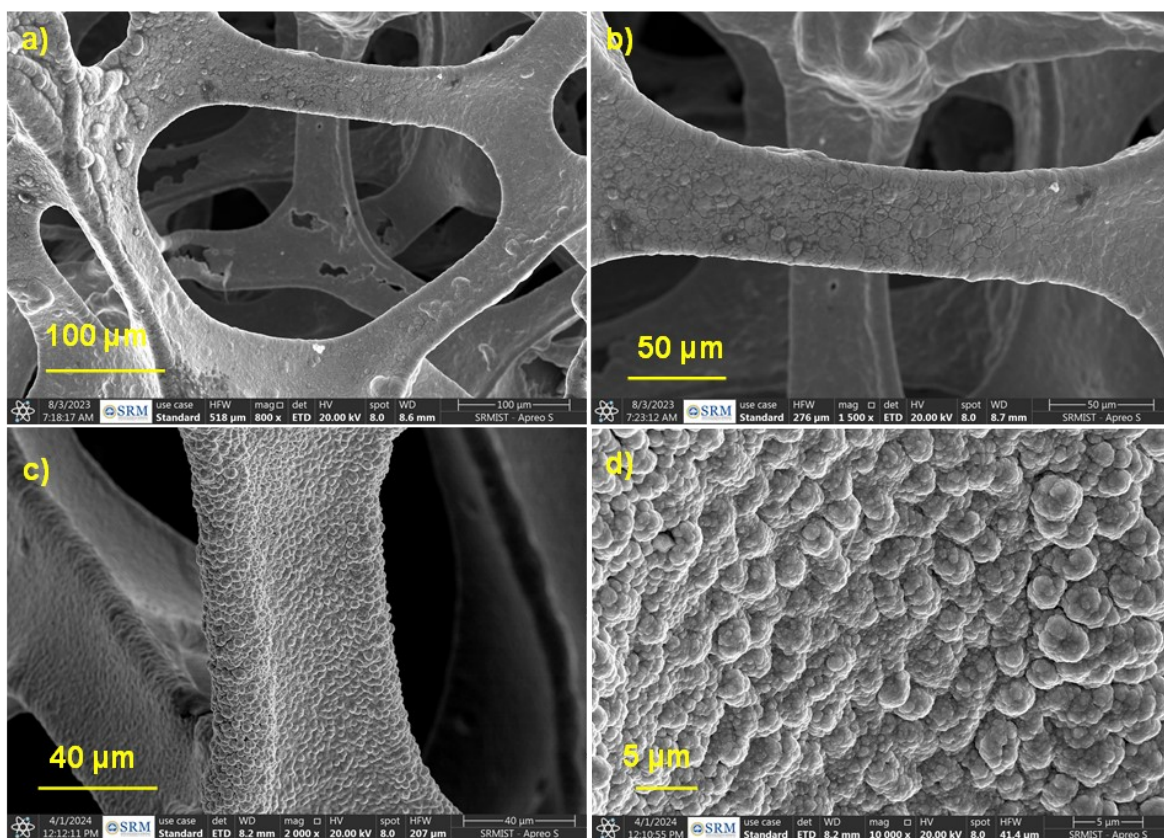

**Fig.S1** (a-d) FE-SEM images of NN showing porosity under different magnifications.

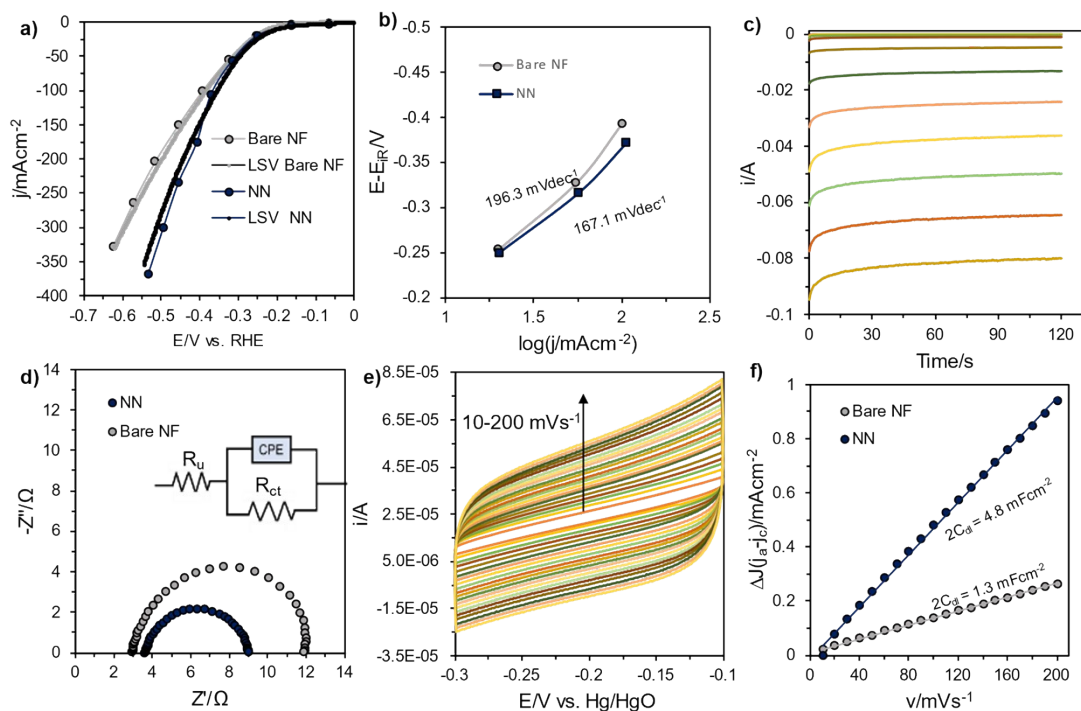

**Fig.S2** (a) LSV and SCV plots, (b) Tafel plots extracted from SCV for bare NF and NN respectively, (c) CA responses of bare NF at a constant potential of -0.8V to -1.8V at 100 mV interval vs.Hg/HgO for 120s, (d) Nyquist plot (inset shows equivalent circuit), (e) CV responses in the Non-Faradaic region from the scanrate 10 mV<sup>s</sup><sup>-1</sup> to 200 mV<sup>s</sup><sup>-1</sup> of bare NF and (f) Linear plot of double-layer charging current density versus scan rate for bare NF and NN.

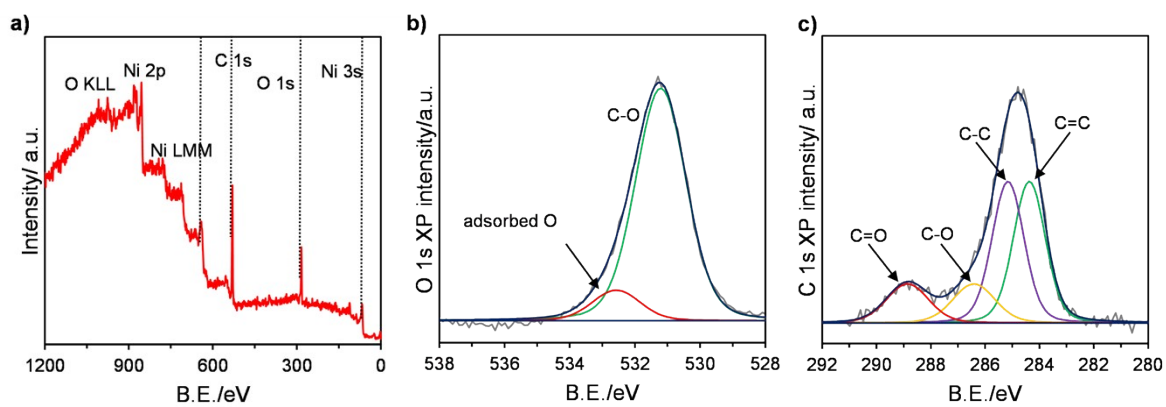

**Fig. S3** (a) XPS survey spectra, Core level (b) O1s and (c) C1s spectra for NNS/NNS<sub>x</sub>.

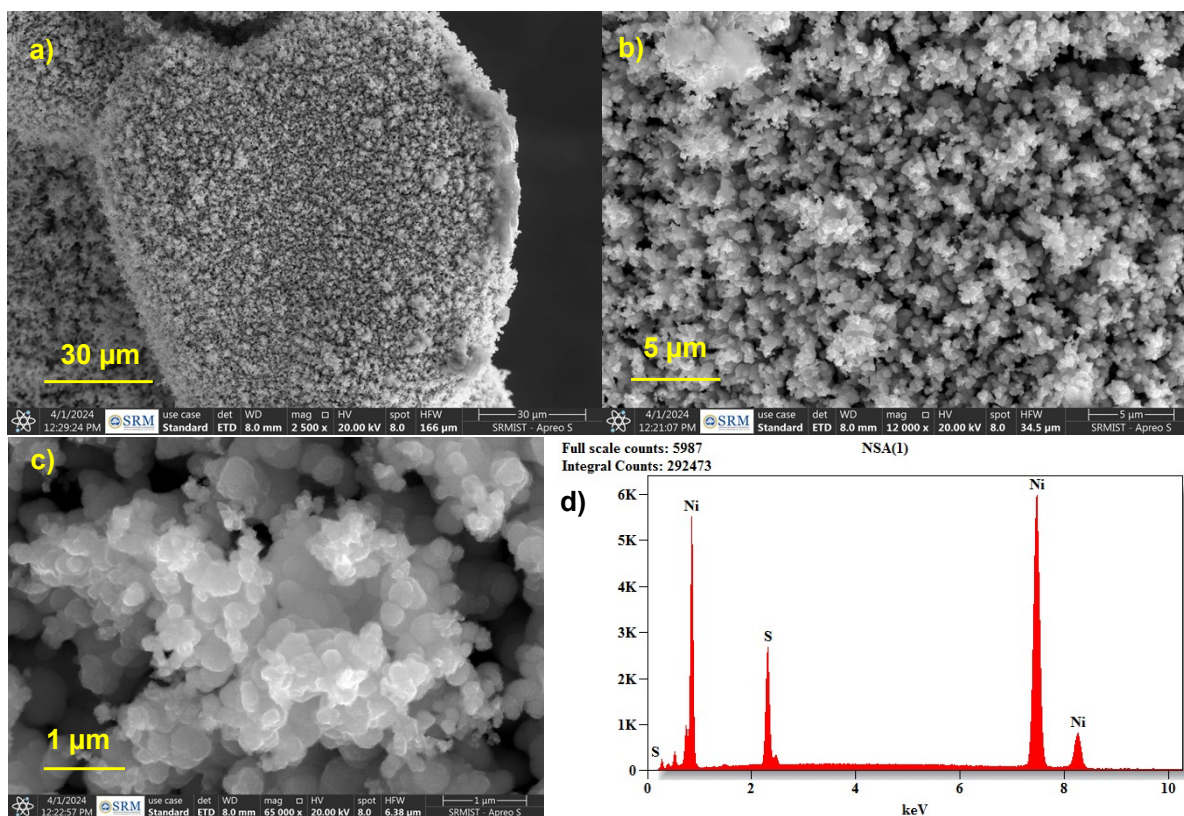

**Fig. S4** (a-c) FESEM images under different magnification and (d) EDX spectra of NNS/NNS<sub>x</sub>.



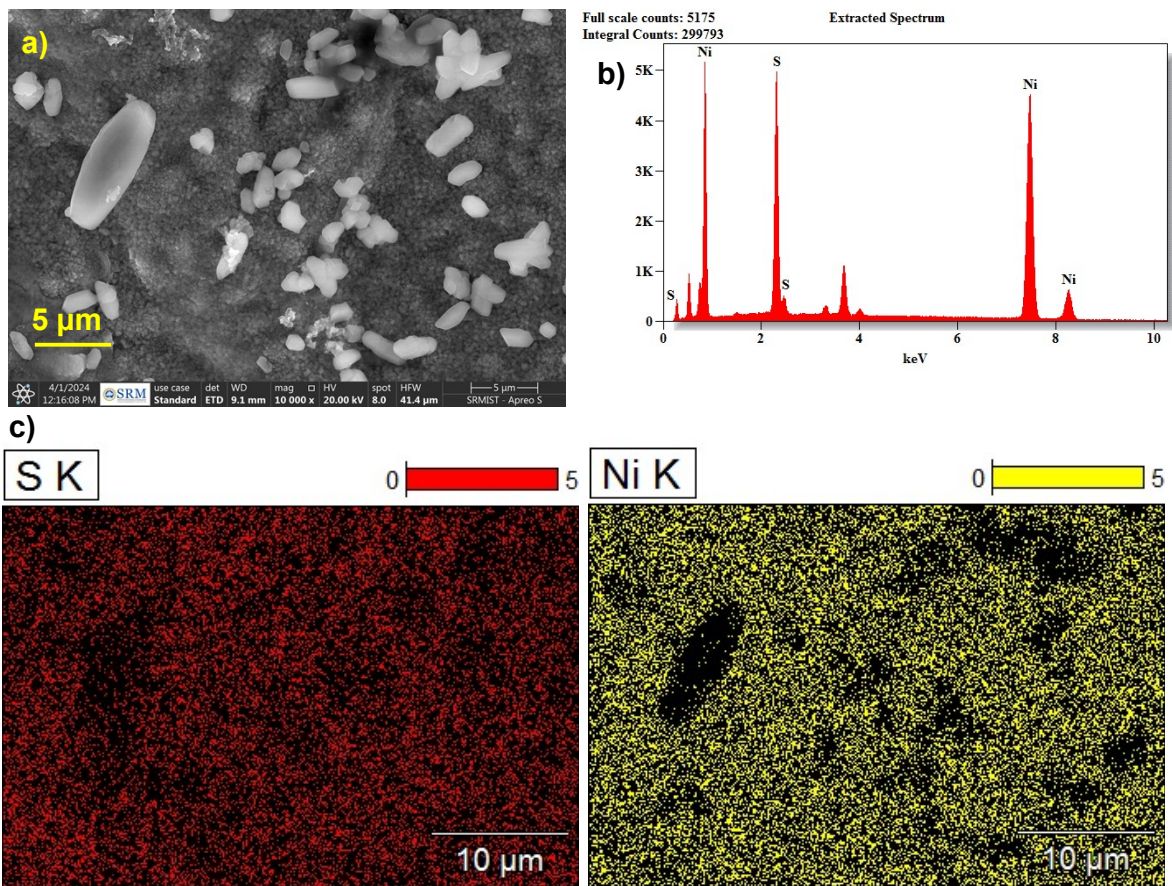

**Fig. S5** (a) FESEM image, (b) EDX spectra and (c) Elemental mapping for the elements Ni and S of NNS.

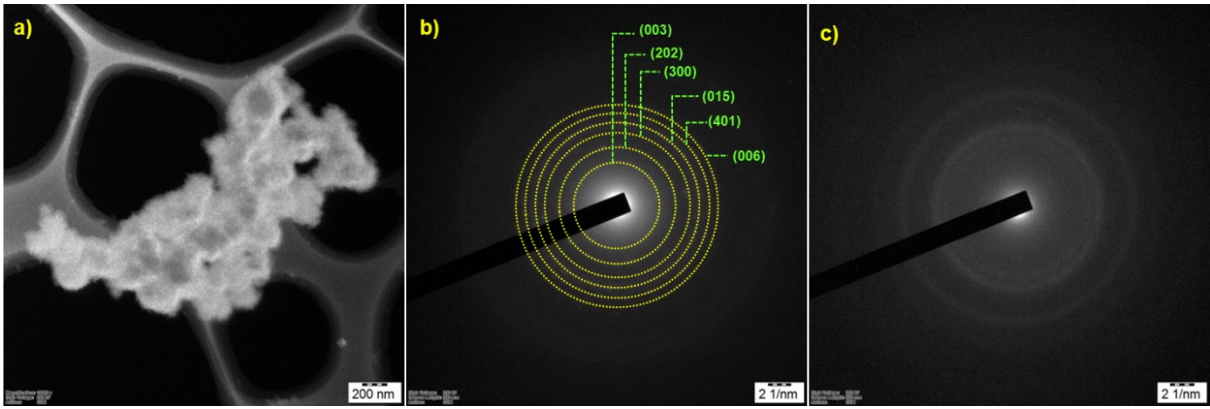

**Fig. S6** (a) Dark Field Scanning Transmission Microscopic (STEM) image, (b) and (c) SAED pattern of NNS/NNS<sub>x</sub>.

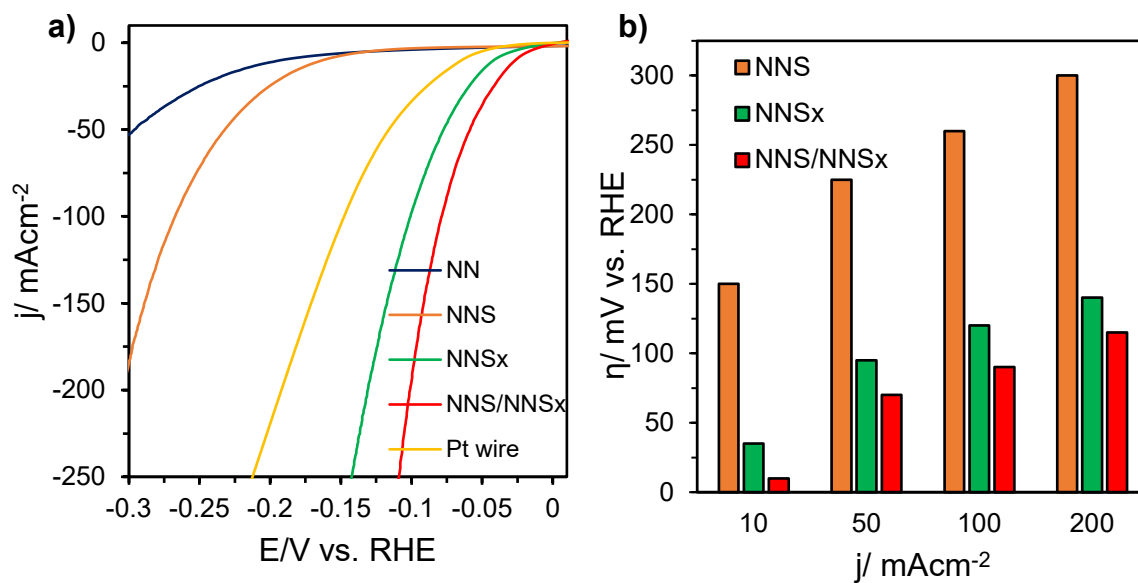

**Fig.S7** (a) LSV plot recorded at a scan-rate of 1 mVs<sup>-1</sup> in 1.0 M KOH with 100% *iR* compensation and (b) Comparative plots of overpotential at 10, 50, 100 and 200 mAcm<sup>-2</sup> current density for different electrocatalysts.

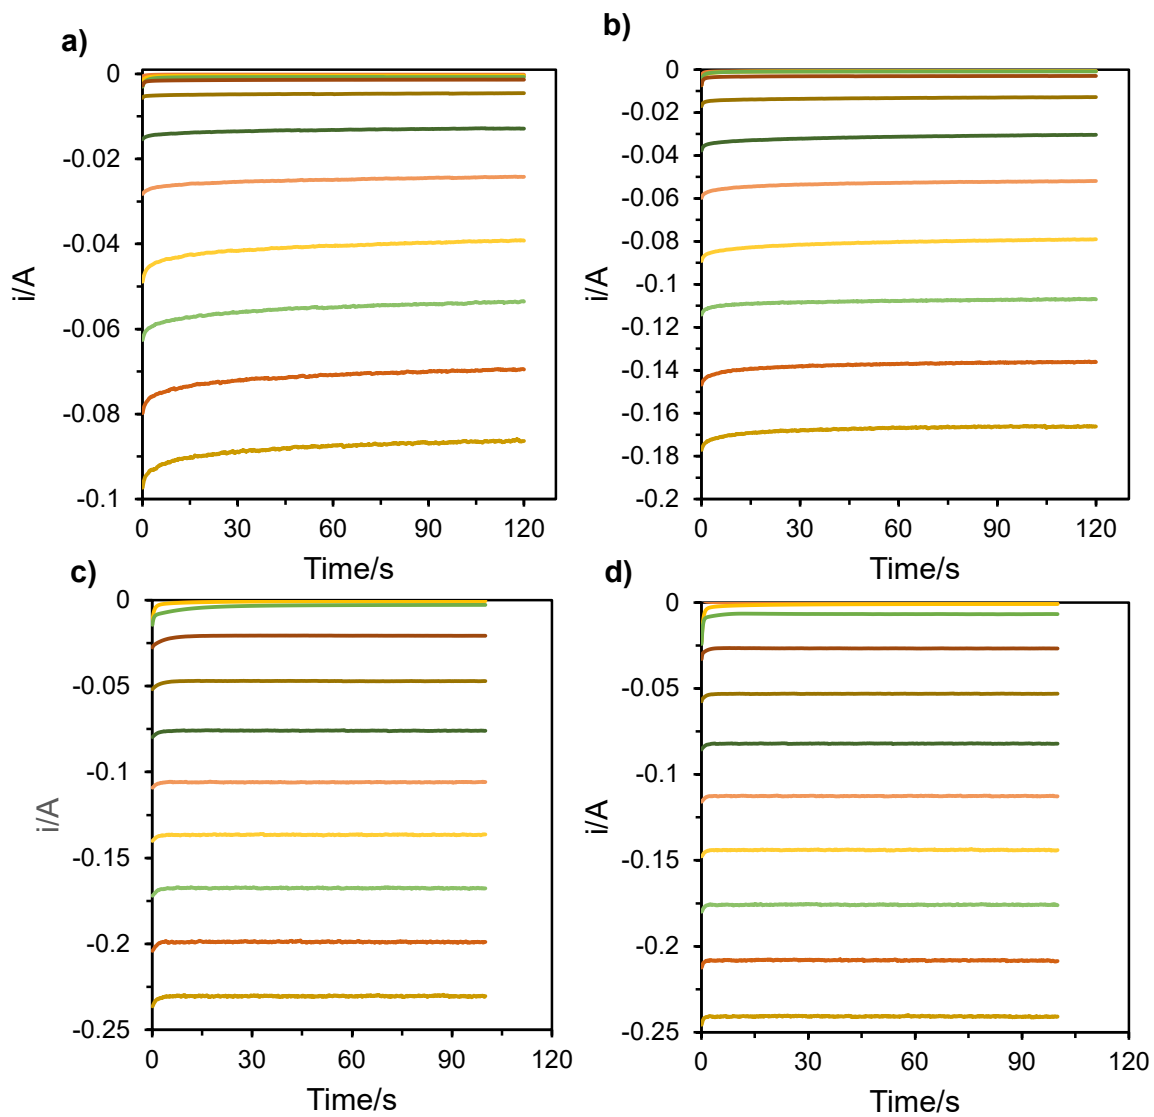

**Fig. S8** CA responses at a constant potential of -0.8V to -1.8V at 100 mV interval vs.Hg/HgO for 120s of (a) NN, (b) NNS, (c) NNS<sub>x</sub>, and (d) NNS/NNS<sub>x</sub> respectively.

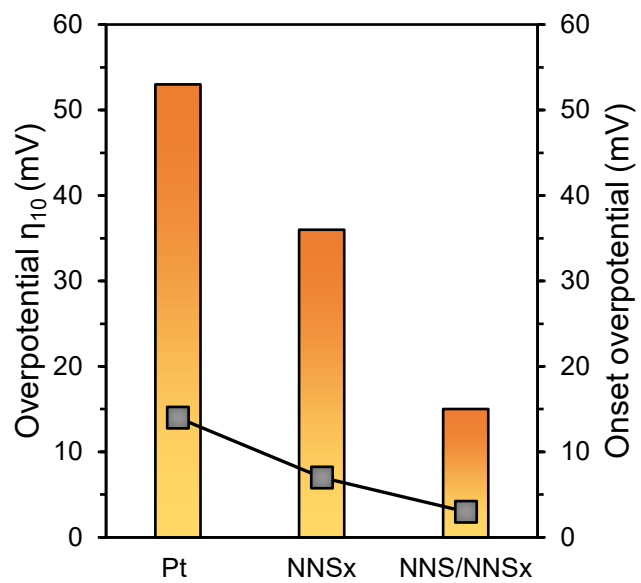

**Fig. S9** Plot showing overpotential at 10 mAcm<sup>-2</sup> and their respective onset overpotential for HER of Pt, NNS<sub>x</sub> and NNS/NNS<sub>x</sub>

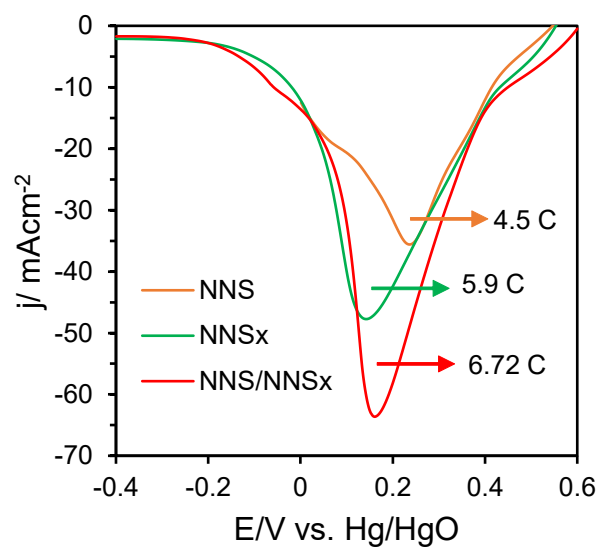

**Fig. S10** The backward sweeps of CVs 1.0 M KOH used for calculating ECAS

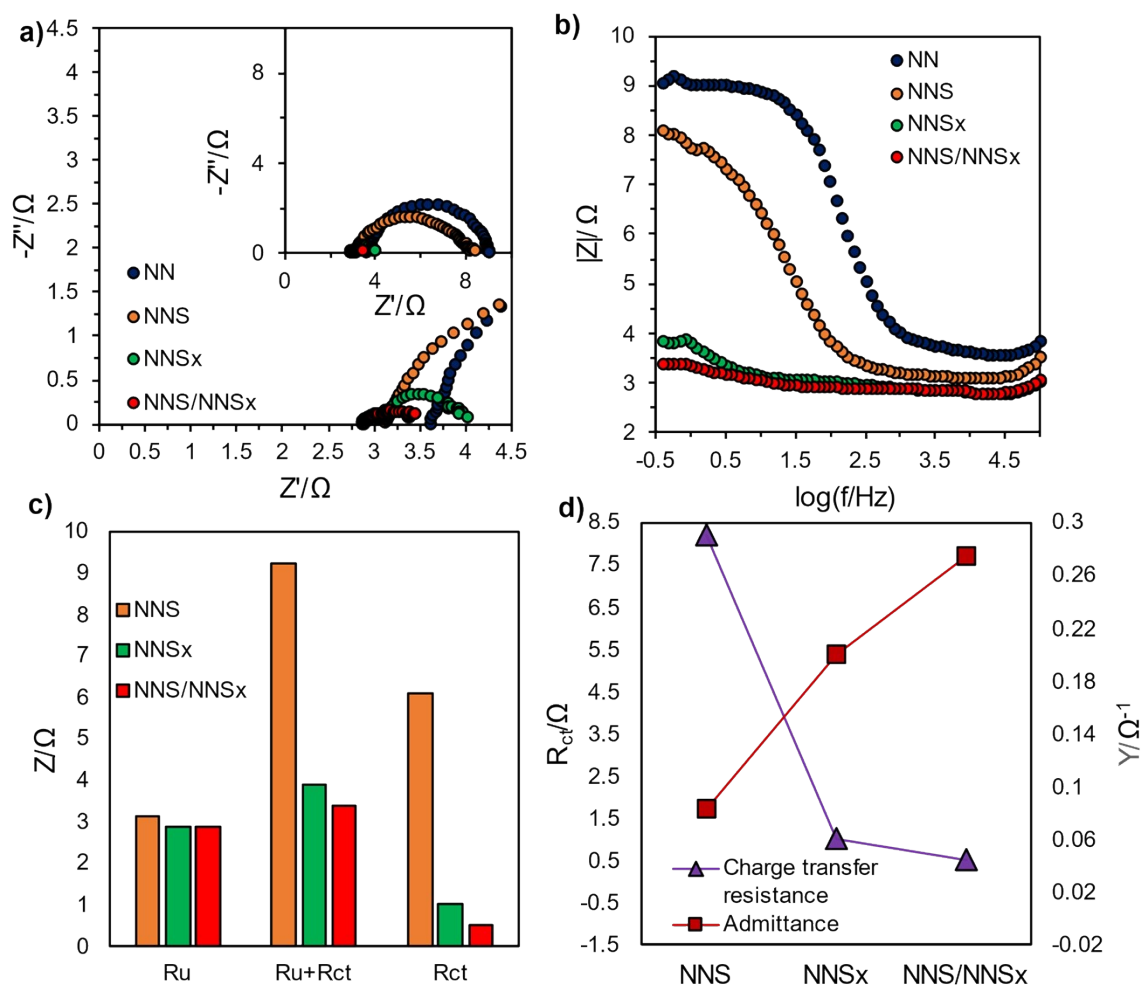

**Fig. S11** (a) Nyquist plot (Inset showing complete semi-circle), (b) Bode-absolute impedance recorded at -1.2V vs. Hg/HgO at 5mV amplitude with an operating frequency between 0.1Hz and 100MHz, (c) Bar chart comparatively showing uncompensated and charge-transfer resistances and (d) Comparative line graph of resistance and admittance for NNS, NNS<sub>x</sub>, and NNS/NNS<sub>x</sub> respectively.

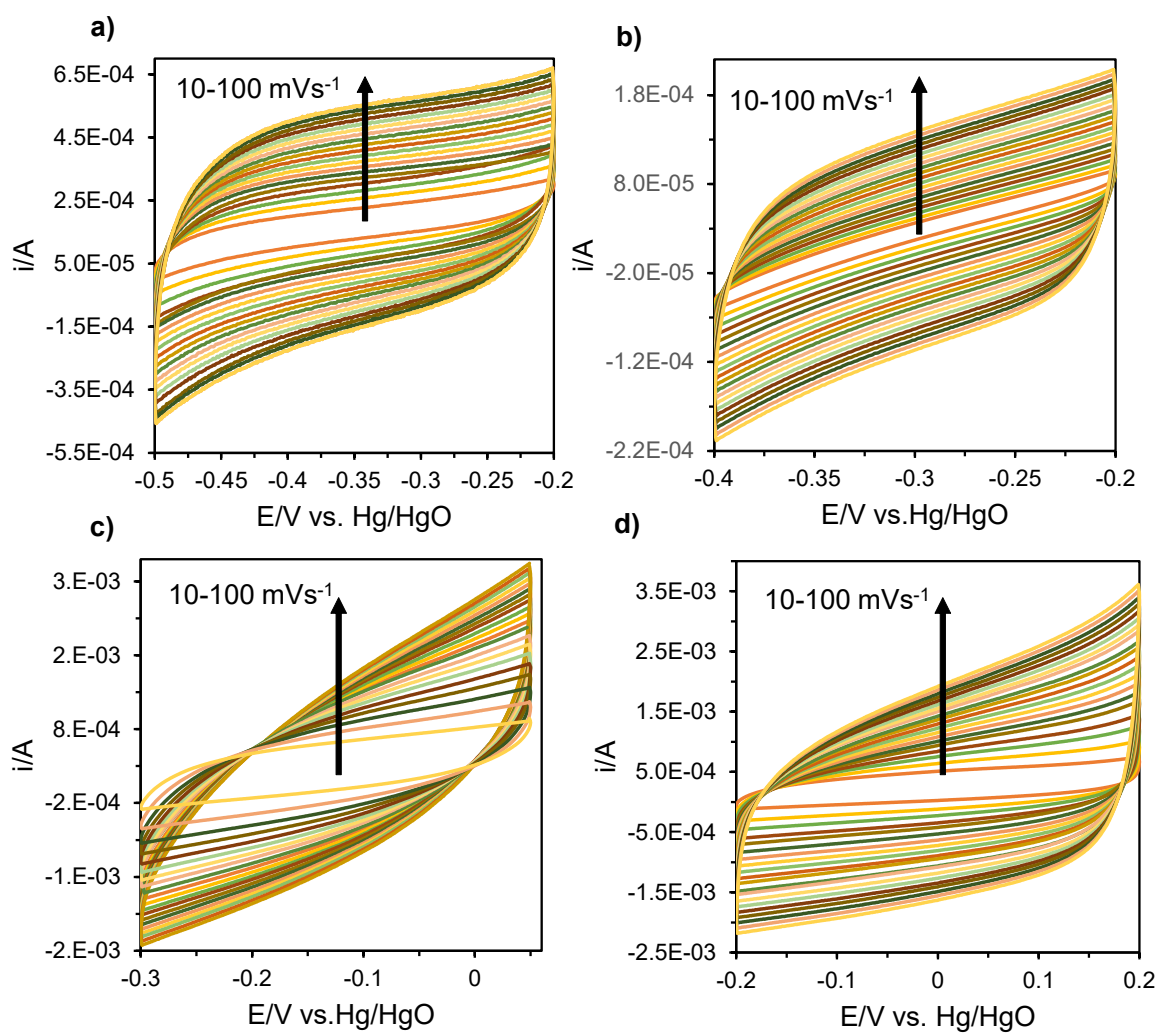

**Fig. S12** CV responses in the non-Faradaic region for calculate  $C_{dl}$  values of (a) NN, (b) NNS, (c)  $NNS_x$  and (d)  $NNS/NNS_x$  respectively.



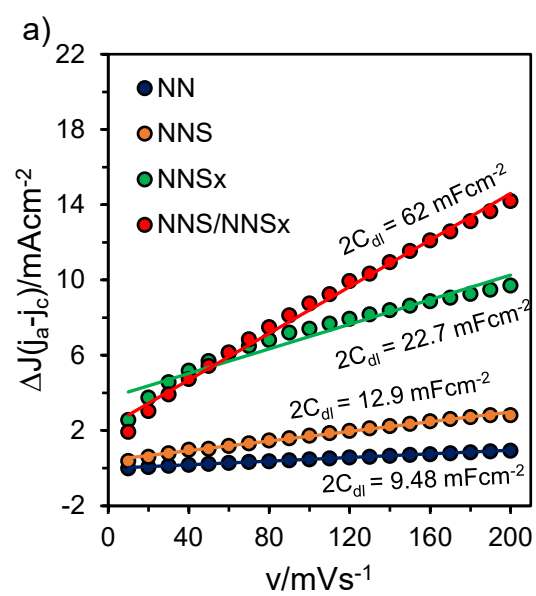

**Fig. S13** Plot of double-layer charging current density recorded in the non-Faradaic region versus scan rate for NN, NNS, NNS<sub>x</sub> and NNS/NNS<sub>x</sub>.

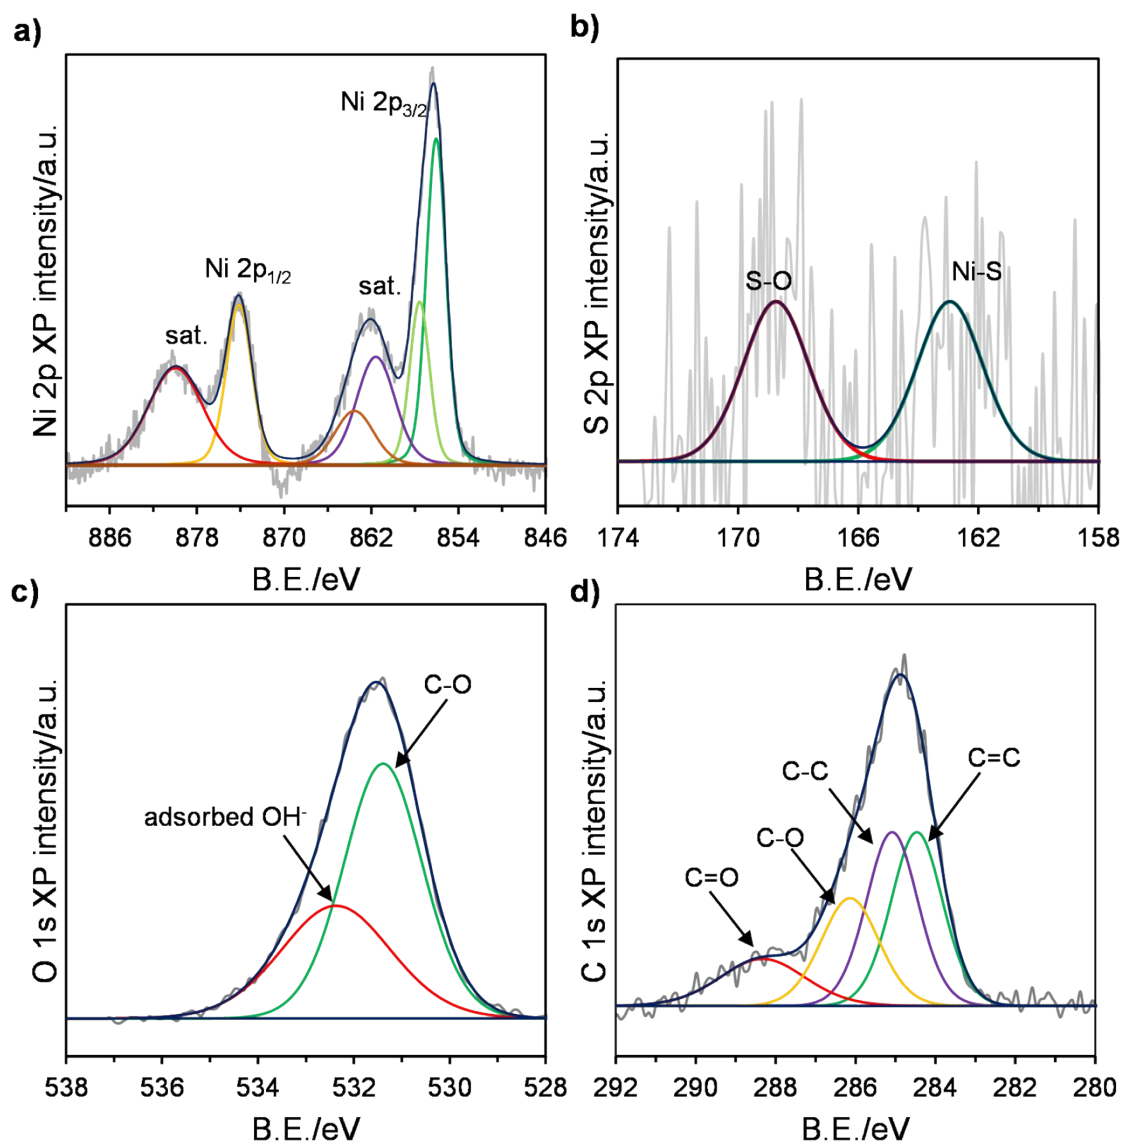

**Fig. S14** Core level (a) Ni2p, (b) S2p, (c) O1s and (d) C1s spectra for NNS/NNS<sub>x</sub> after HER accelerated degradation results.

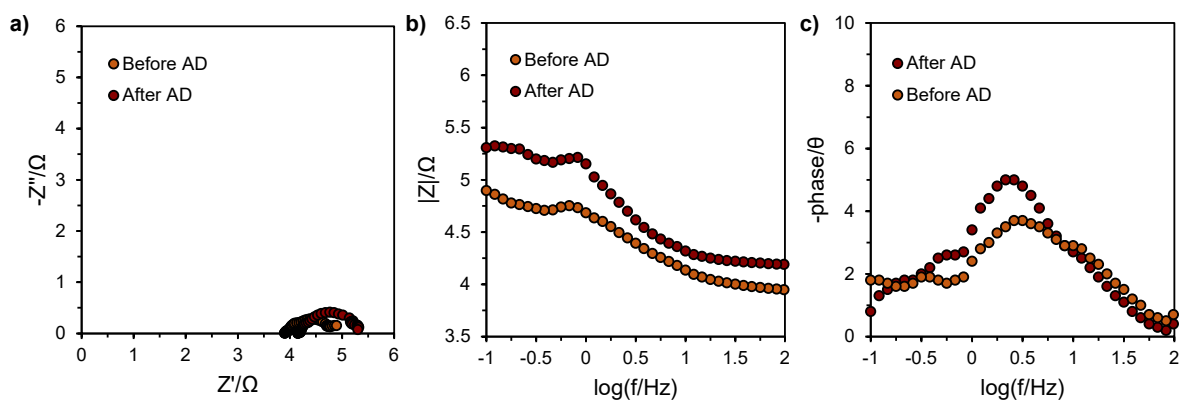

**Fig. S15** EIS results (a) Nyquist plot, (b) Bode-absolute impedance plot and (c) Bode-phase angle plot for NNS/NNS<sub>x</sub> showing before and after HER accelerated degradation.

**Table S1.** Comparison table for the electrochemical activity of alkaline hydrogen evolution reaction with various electrocatalysts

| Electrocatalyst                                                | Overpotential, $\eta_{10}$ (mV) | Maximum $j$ (mAcm <sup>-2</sup> ) and $\eta_j$ (mV) | Tafel slope (mV dec <sup>-1</sup> ) | Onset overpotential (mV) | Reference        |
|----------------------------------------------------------------|---------------------------------|-----------------------------------------------------|-------------------------------------|--------------------------|------------------|
| NiS nanoflower                                                 | 97                              | 100 and 280                                         | 65.90                               | 600                      | 4                |
| Ni <sub>3</sub> S <sub>2</sub> @CNTs/CC                        | 381                             | 120 and 550                                         | -                                   | 250                      | 5                |
| $\alpha$ -NiS@NDCDs/NF                                         | 173                             | -                                                   | 81                                  | 117                      | 6                |
| DLHCs@Ni <sub>x</sub> S <sub>y</sub>                           | 263                             | -                                                   | 88.23                               | 162                      | 7                |
| Vs-Ni <sub>3</sub> S <sub>2</sub> /NF)                         | 88                              | 100 and 218                                         | 87                                  | 50                       | 8                |
| Amorphous Ni <sub>3.09</sub> S                                 | 43.8                            | 120 and 150                                         | 79.9                                | -                        | 9                |
| Pt <sub>3</sub> Ni <sub>2</sub> NWs-S/C                        | 42                              | 35 and 70                                           | -                                   | 10                       | 10               |
| Ni <sub>x</sub> S/NF                                           | 113                             | 80 and 320                                          | 90                                  | 25                       | 11               |
| O-Ni <sub>3</sub> S <sub>2</sub>                               | 68.4                            | 800 and 290                                         | 60.62                               | 100                      | 12               |
| <b>Ni<sub>3</sub>S<sub>2</sub>/Ni<sub>x</sub>S<sub>y</sub></b> | <b>15</b>                       | <b>1200 and 180</b>                                 | <b>68.5</b>                         | <b>3</b>                 | <b>This work</b> |

1. B. Zhong, S. Wan, P. Kuang, B. Cheng, L. Yu and J. Yu, *Applied Catalysis B: Environmental*, 2024, **340**, 123195.
2. S. Anantharaj, S. Kundu and S. Noda, *Journal of the Electrochemical Society*, 2022, **169**, 014508.
3. S. Anantharaj, P. E. Karthik and S. Noda, *Journal of Colloid and Interface Science*, 2023, **634**, 169-175.
4. B. Zhang, X. Li and M. Liu, *International Journal of Electrochemical Science*, 2024, 100579.
5. R. C. Gotame, Y. R. Poudel, B. Dahal, A. Thapa, C. Dares and W. Li, *International Journal of Hydrogen Energy*, 2024, **51**, 671-680.
6. C. Pitchai, S. M. Gopalakrishnan and C.-M. Chen, *Energy & Fuels*, 2024.
7. C. Liu, X. Zhang, Y. Cheng, X. Hao and P. Yang, *Electrochimica Acta*, 2024, **477**, 143751.
8. D. Jia, L. Han, Y. Li, W. He, C. Liu, J. Zhang, C. Chen, H. Liu and H. L. Xin, *Journal of Materials Chemistry A*, 2020, **8**, 18207-18214.
9. C. Miao, X. Zheng, J. Sun, H. Wang, J. Qiao, N. Han, S. Wang, W. Gao, X. Liu and Z.-x. Yang, *ACS Applied Energy Materials*, 2021, **4**, 927-933.
10. P. Wang, X. Zhang, J. Zhang, S. Wan, S. Guo, G. Lu, J. Yao and X. Huang, *Nature communications*, 2017, **8**, 14580.
11. Z. Fang, Y. Wang, Y. Zou, Z. Hao and Q. Dong, *Inorganic Chemistry Communications*, 2017, **79**, 1-4.
12. X. Zheng, L. Zhang, J. Huang, L. Peng, M. Deng, L. Li, J. Li, H. Chen and Z. Wei, *The Journal of Physical Chemistry C*, 2020, **124**, 24223-24231.
